# Supplementary material for: Unravelling the cellular sources and location of IL-17A production during a Giardia infection
Source: Research Square preprint supplement (doi:10.21203/rs.3.rs-6836025/v1), 2025-06-23
Supplement: Supplementary file 1 [file ac93258c701fafce407c5339.pdf]

## **SUPPLEMENTARY INFORMATION**

### **Unravelling the cellular sources and location of IL-17A production during a**

### ***Giardia* infection**

Charlotte E. Van Crombrugge<sup>1\*</sup>, Bregt Decorte<sup>1</sup>, Leen J.M. Seys<sup>1</sup>, Peter Geldhof<sup>1</sup>

<sup>1</sup> Faculty of Veterinary Medicine, Ghent University, Merelbeke, Belgium.

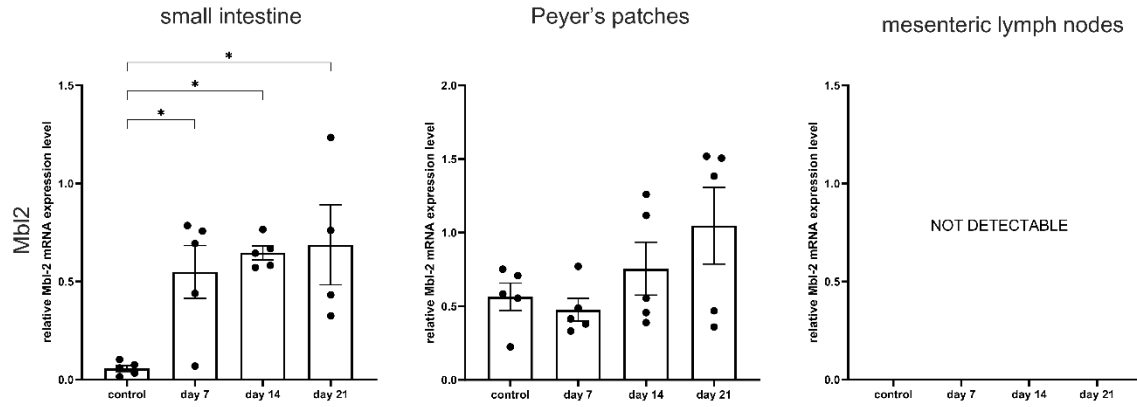

**Supplementary Figure S1.** Relative Mbl2 mRNA expression levels in the SI, PP and MLN of C57BL/6 mice at day 7, 14 and 21 p.i. as measured by RT-qPCR (n=5). Differences were analyzed using a Kruskal-Wallis test (\* $P < 0.05$ ).

a

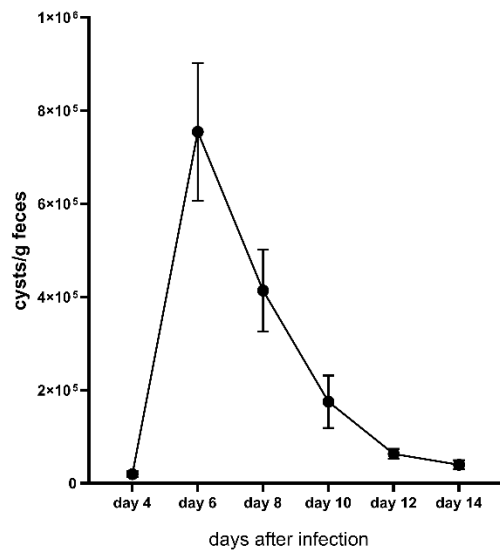

b

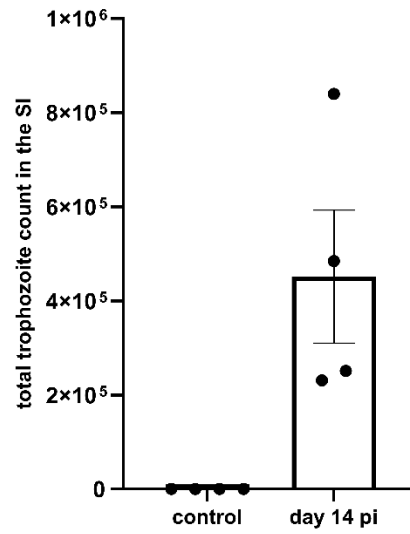

**Supplementary Figure S2.** Parasitological parameters of the second study in C57BL/6 mice. (a) Fecal cyst counts monitored every 2-3 days until day 14 p.i.. Each point on the graph represents the mean cyst output per gram of feces, with SEM as error bars (n=4). (b) Small intestinal trophozoite counts at day 14 p.i. (n=4).

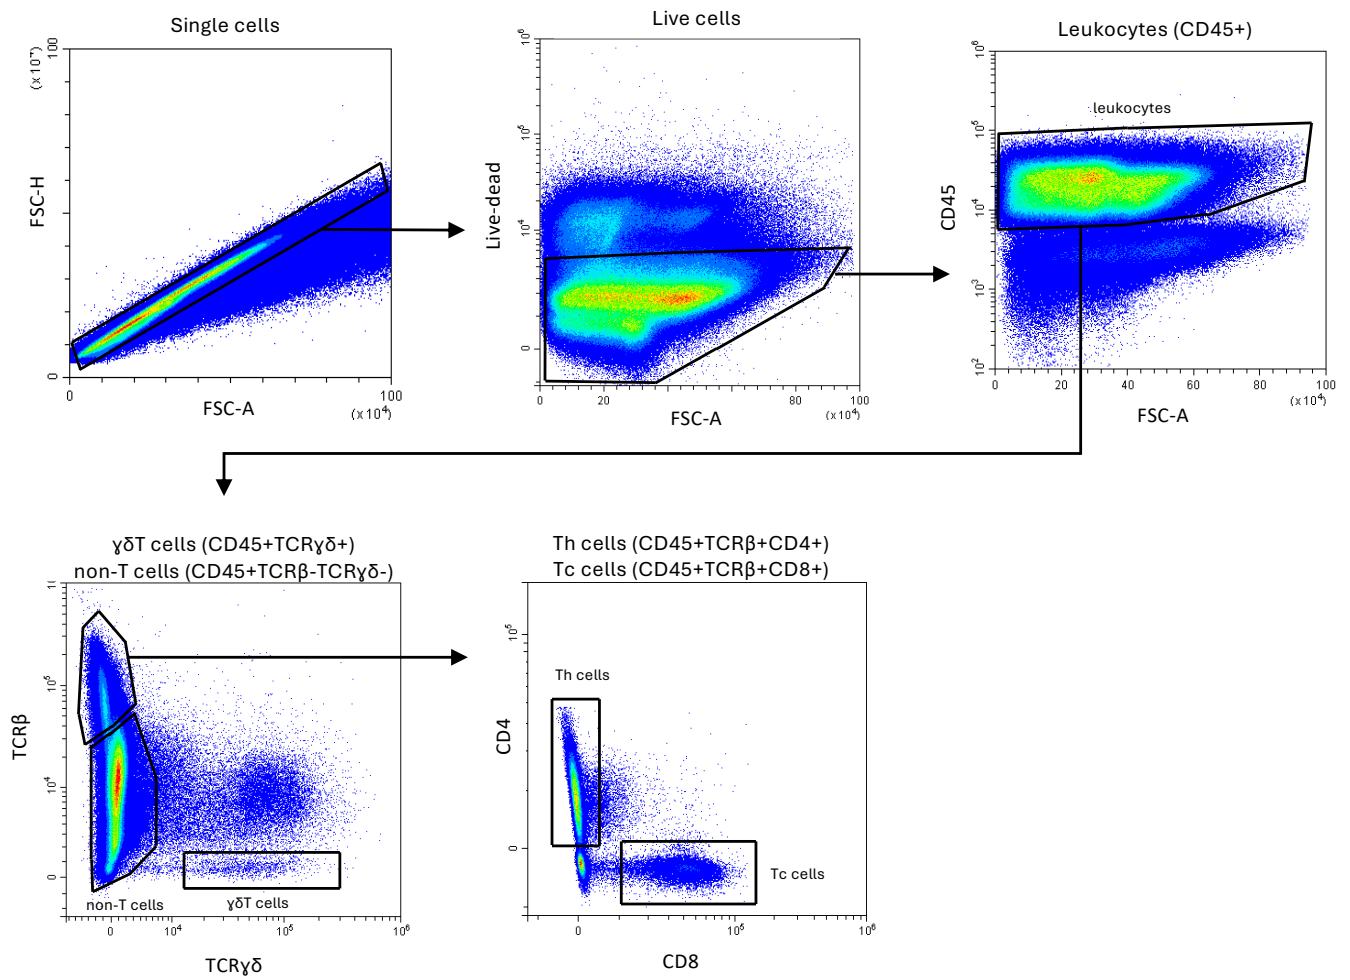

**Supplementary Figure S3.** Flow cytometry panel 1. Gating strategy for leukocytes, Th cells, Tc cells,  $\gamma\delta$ T cells and non-T cells.

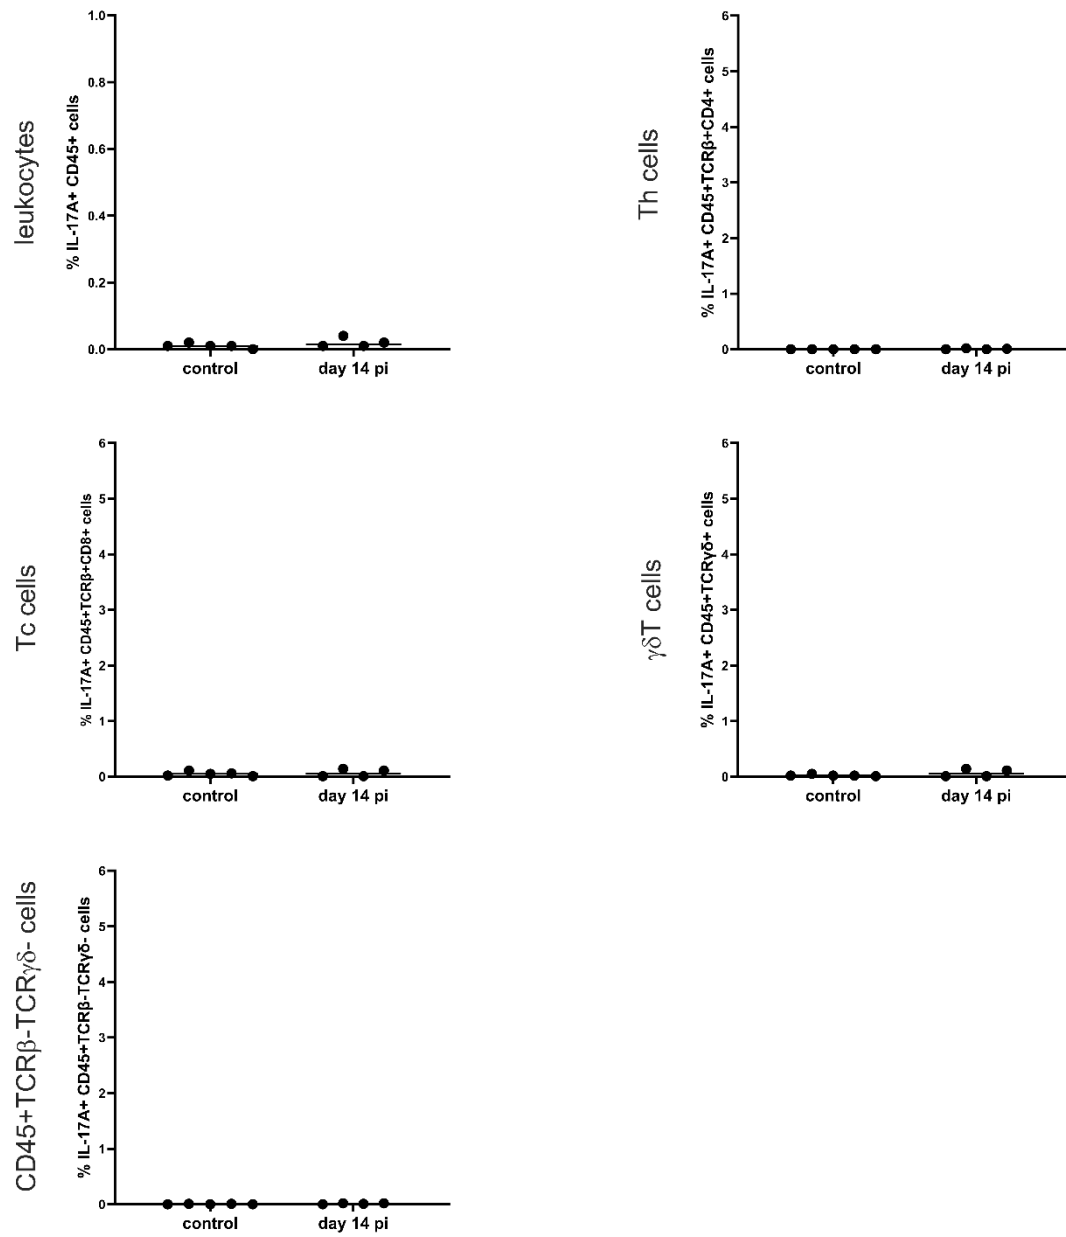

**Supplementary Figure S4.** IL-17A production by different cell types in the intra-epithelial compartment of *G. muris* infected C57BL/6 mice at day 14 p.i. as measured by flow cytometry, expressed as %IL-17A+ cells of parent population. Differences were analyzed using a Mann-Whitney test.

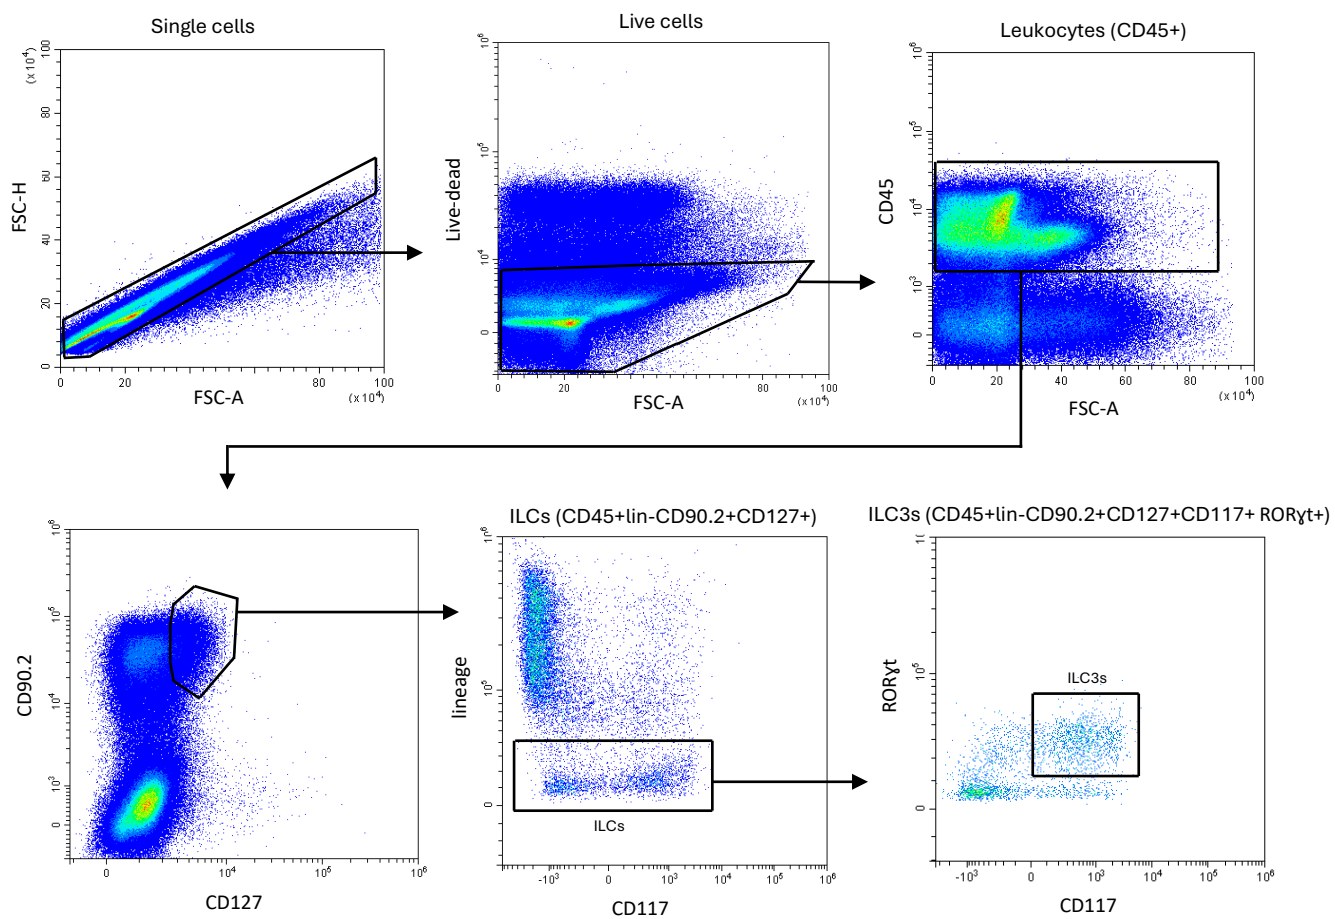

**Supplementary Figure S5.** Flow cytometry panel 2. Gating strategy for ILCs and ILC3s.

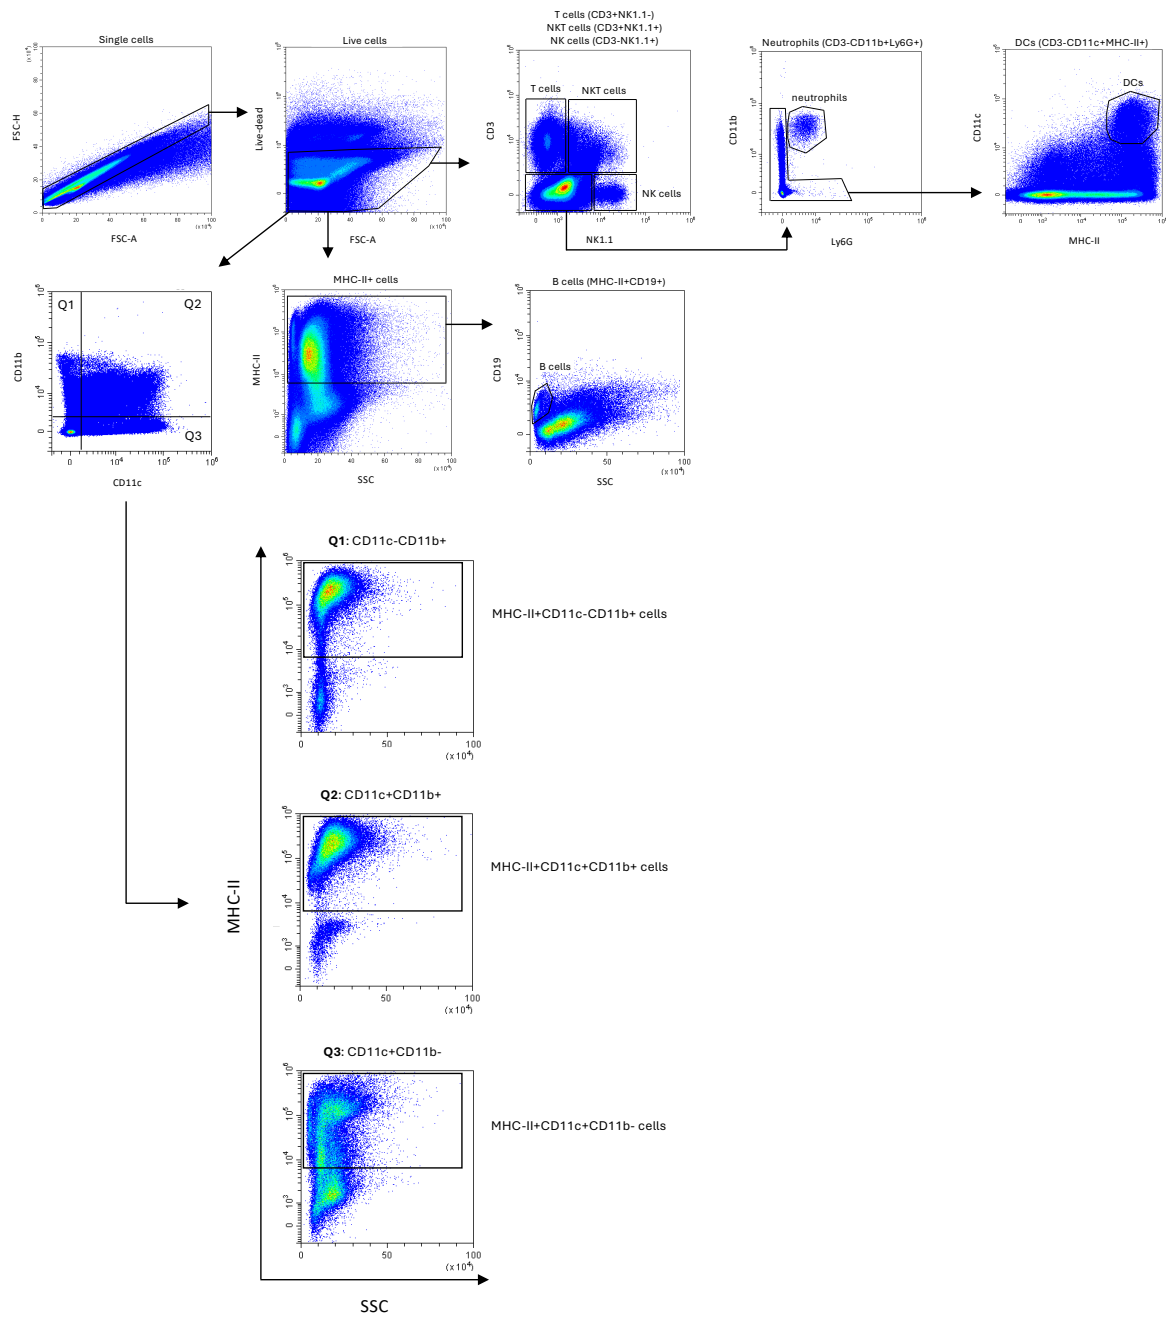

**Supplementary Figure S6.** Flow cytometry panel 3. Gating strategy for T cells, NKT cells, NK cells, neutrophils, DCs, MHC-II+ cells and MHC-II+CD11c<sup>±</sup>/CD11b<sup>±</sup> cells. Only in TKO mice, phenotyping of B cells was included.

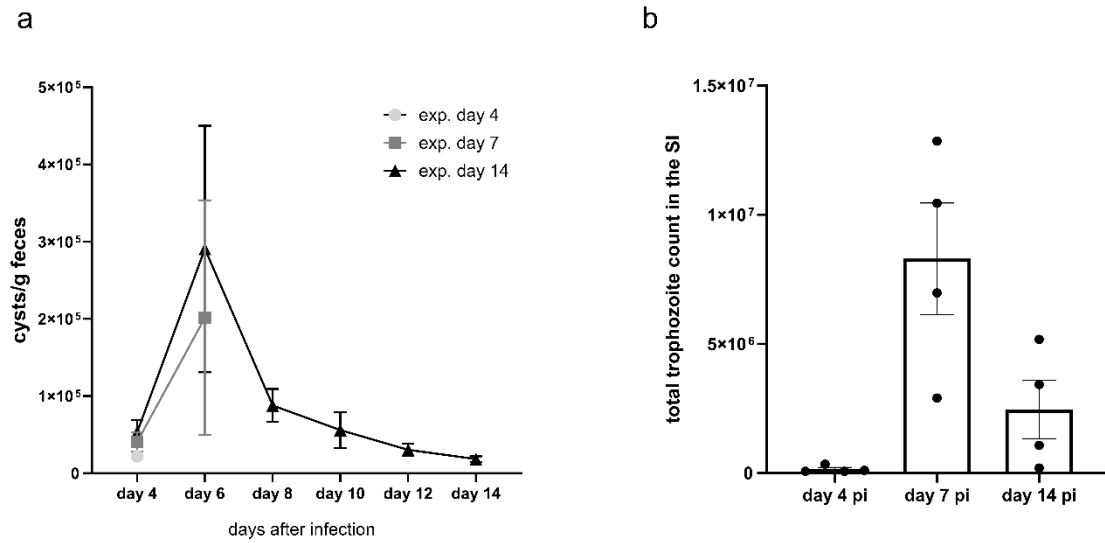

**Supplementary Figure S7.** Parasitological parameters of the third study in C57BL/6 mice. (a) Fecal cyst counts monitored every 2-3 days until day 4, day 7 and 14 p.i. for each study. Each point on the graph represents the mean cyst output per gram of feces, with SEM as error bars (n=4). (b) Small intestinal trophozoite counts at day 4, 7 and 14 p.i. (n=4).



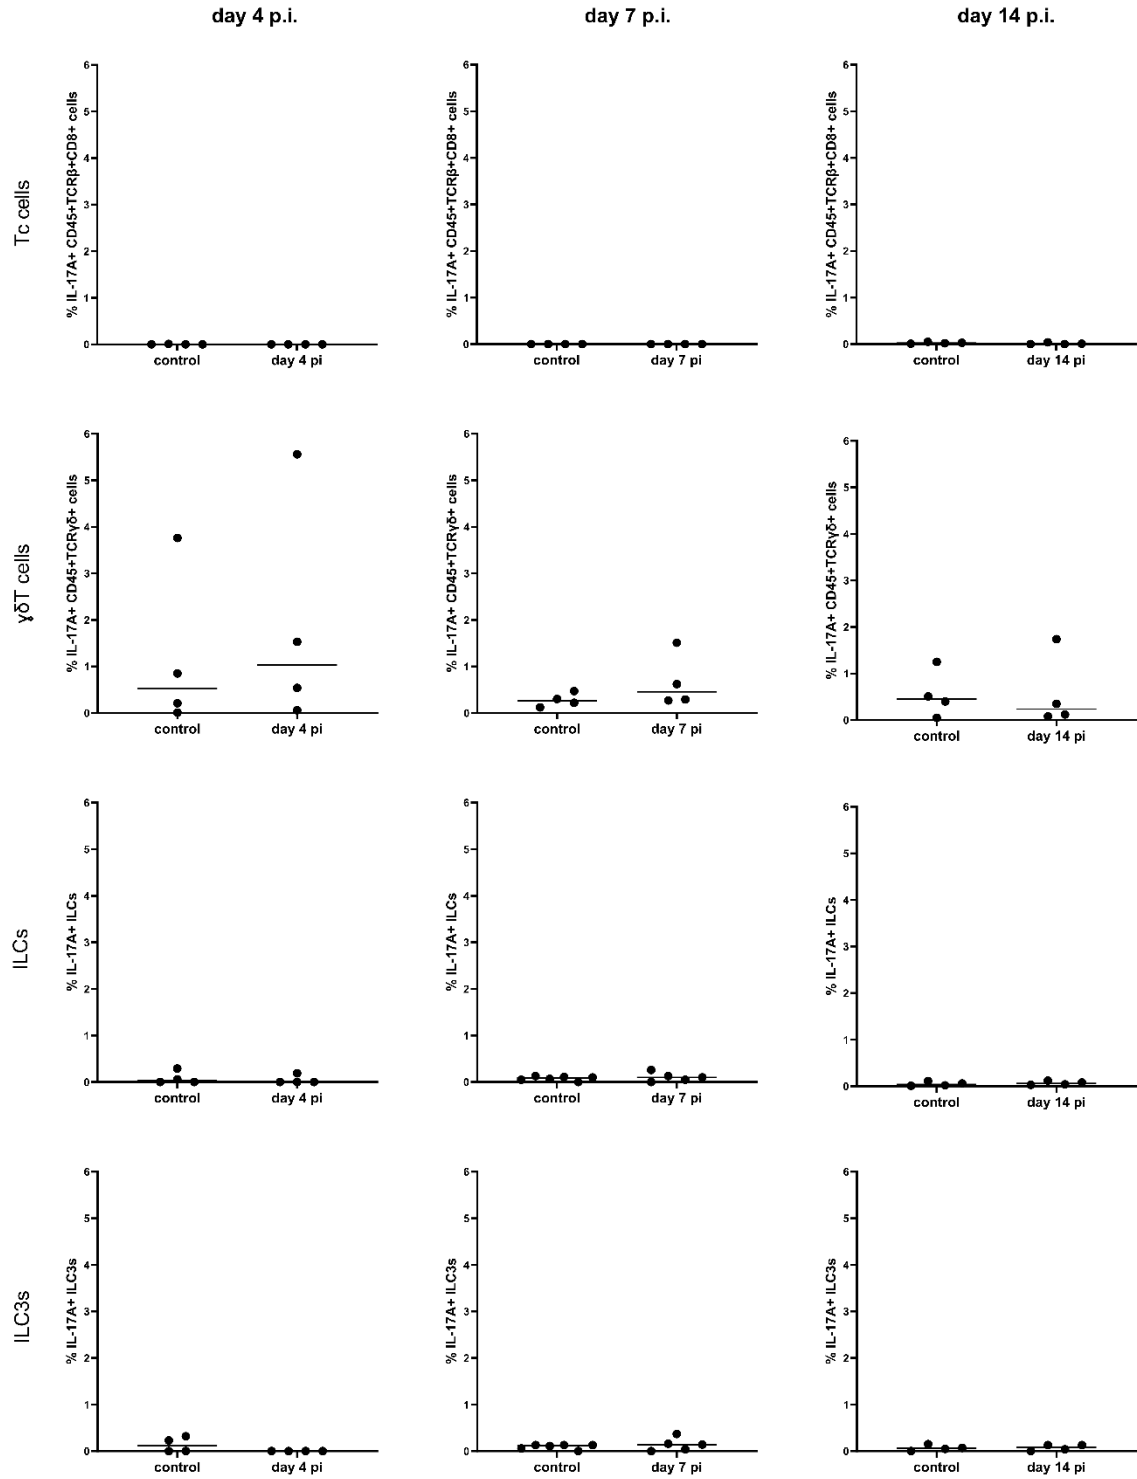

**Supplementary Figure S8.** IL-17A production by different cell types in the lamina propria compartment of *G. muris* infected C57BL/6 mice at day 4, 7 and 14 p.i. as measured by flow cytometry, expressed as %IL-17A+ cells of parent population. Differences were analyzed using a Mann-Whitney test.

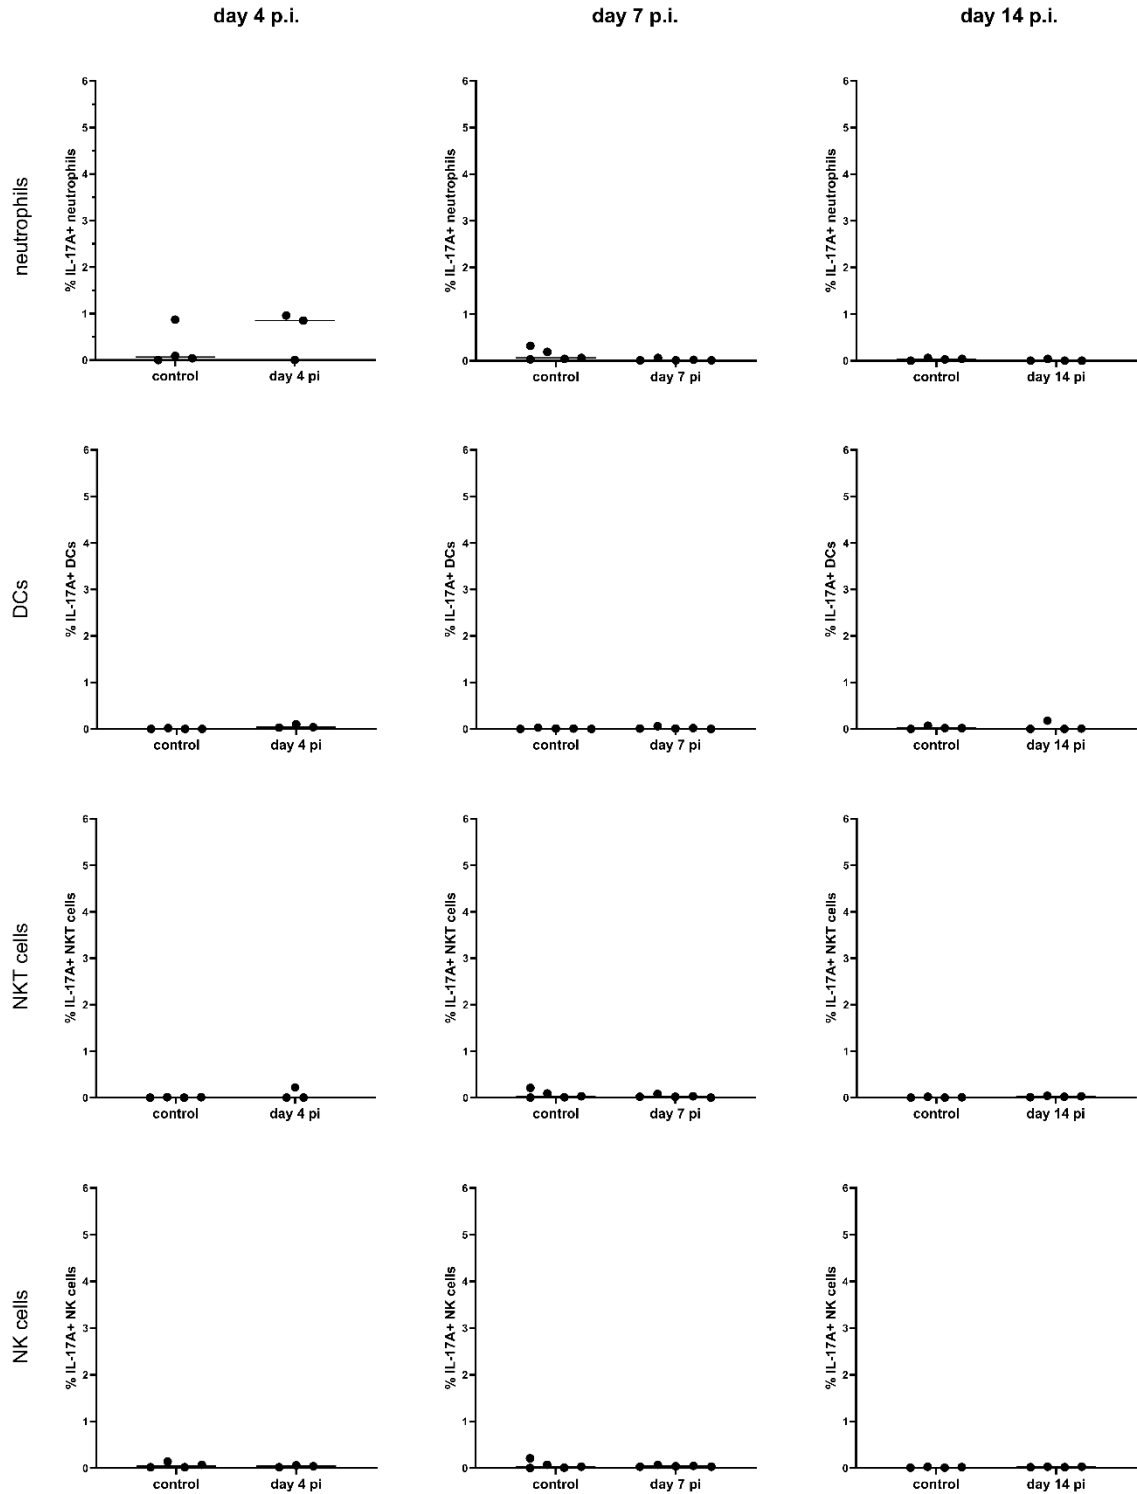

**Supplementary Figure S9.** IL-17A production by different cell types in the lamina propria compartment of *G. muris* infected C57BL/6 mice at day 4, 7 and 14 p.i. as measured by flow cytometry, expressed as %IL-17A+ cells of parent population. Differences were analyzed using a Mann-Whitney test.

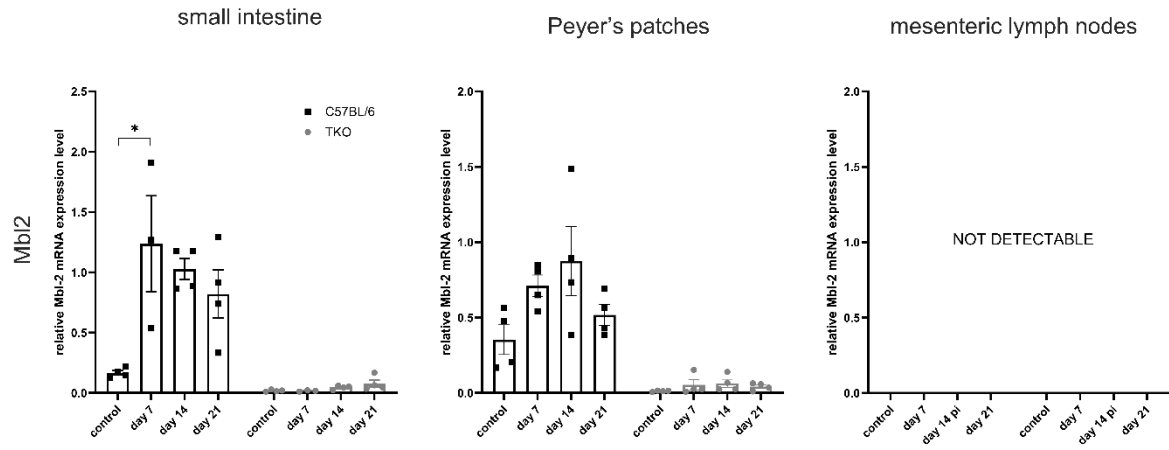

**Supplementary Figure S10.** Relative Mbl2 mRNA expression levels in the SI, PP and MLN of C57BL/6 and TKO mice at day 7, 14 and 21 p.i. as measured by RT-qPCR (n=4). Differences were analyzed using a Kruskal-Wallis test (\* $P < 0.05$ ).

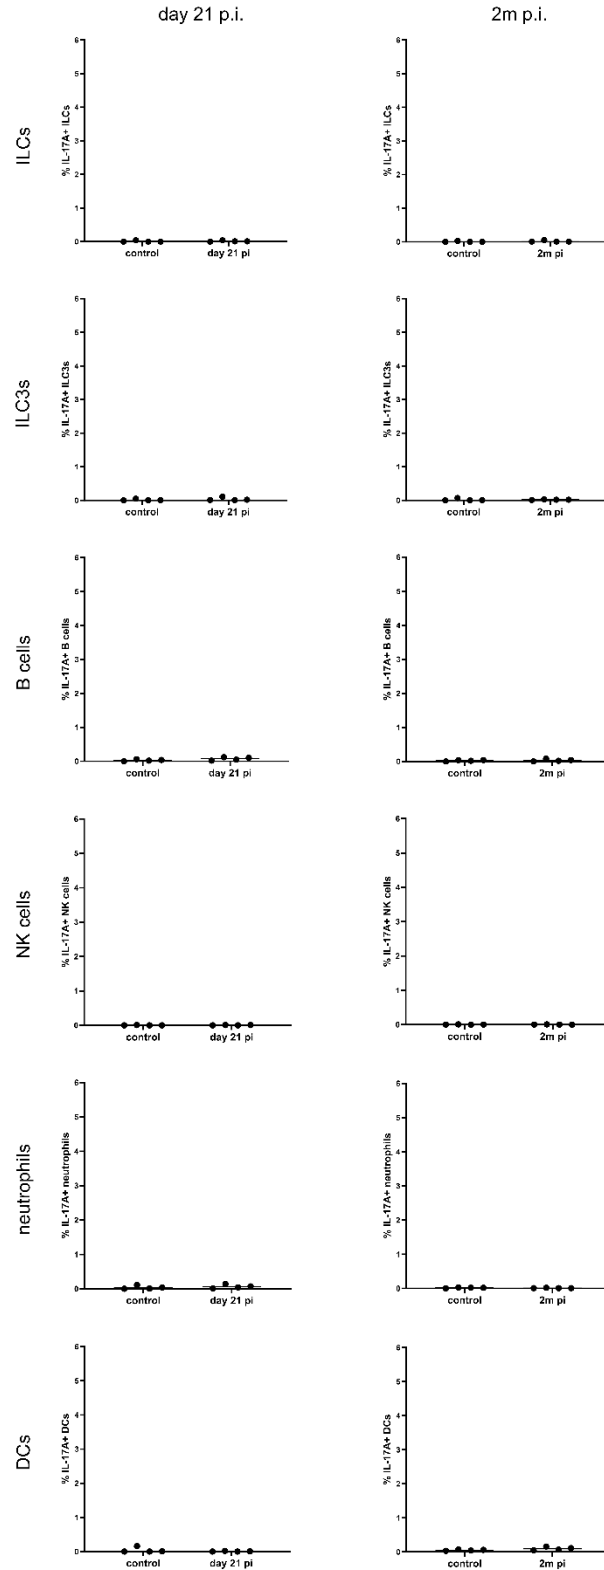

**Supplementary Figure S11.** IL-17A production by different cell types in the lamina propria compartment of *G. muris* infected TKO mice at day 21 and 2 months p.i. as measured by flow cytometry, expressed as %IL-17A<sup>+</sup> cells of parent population. Differences were analyzed using a Mann-Whitney test.

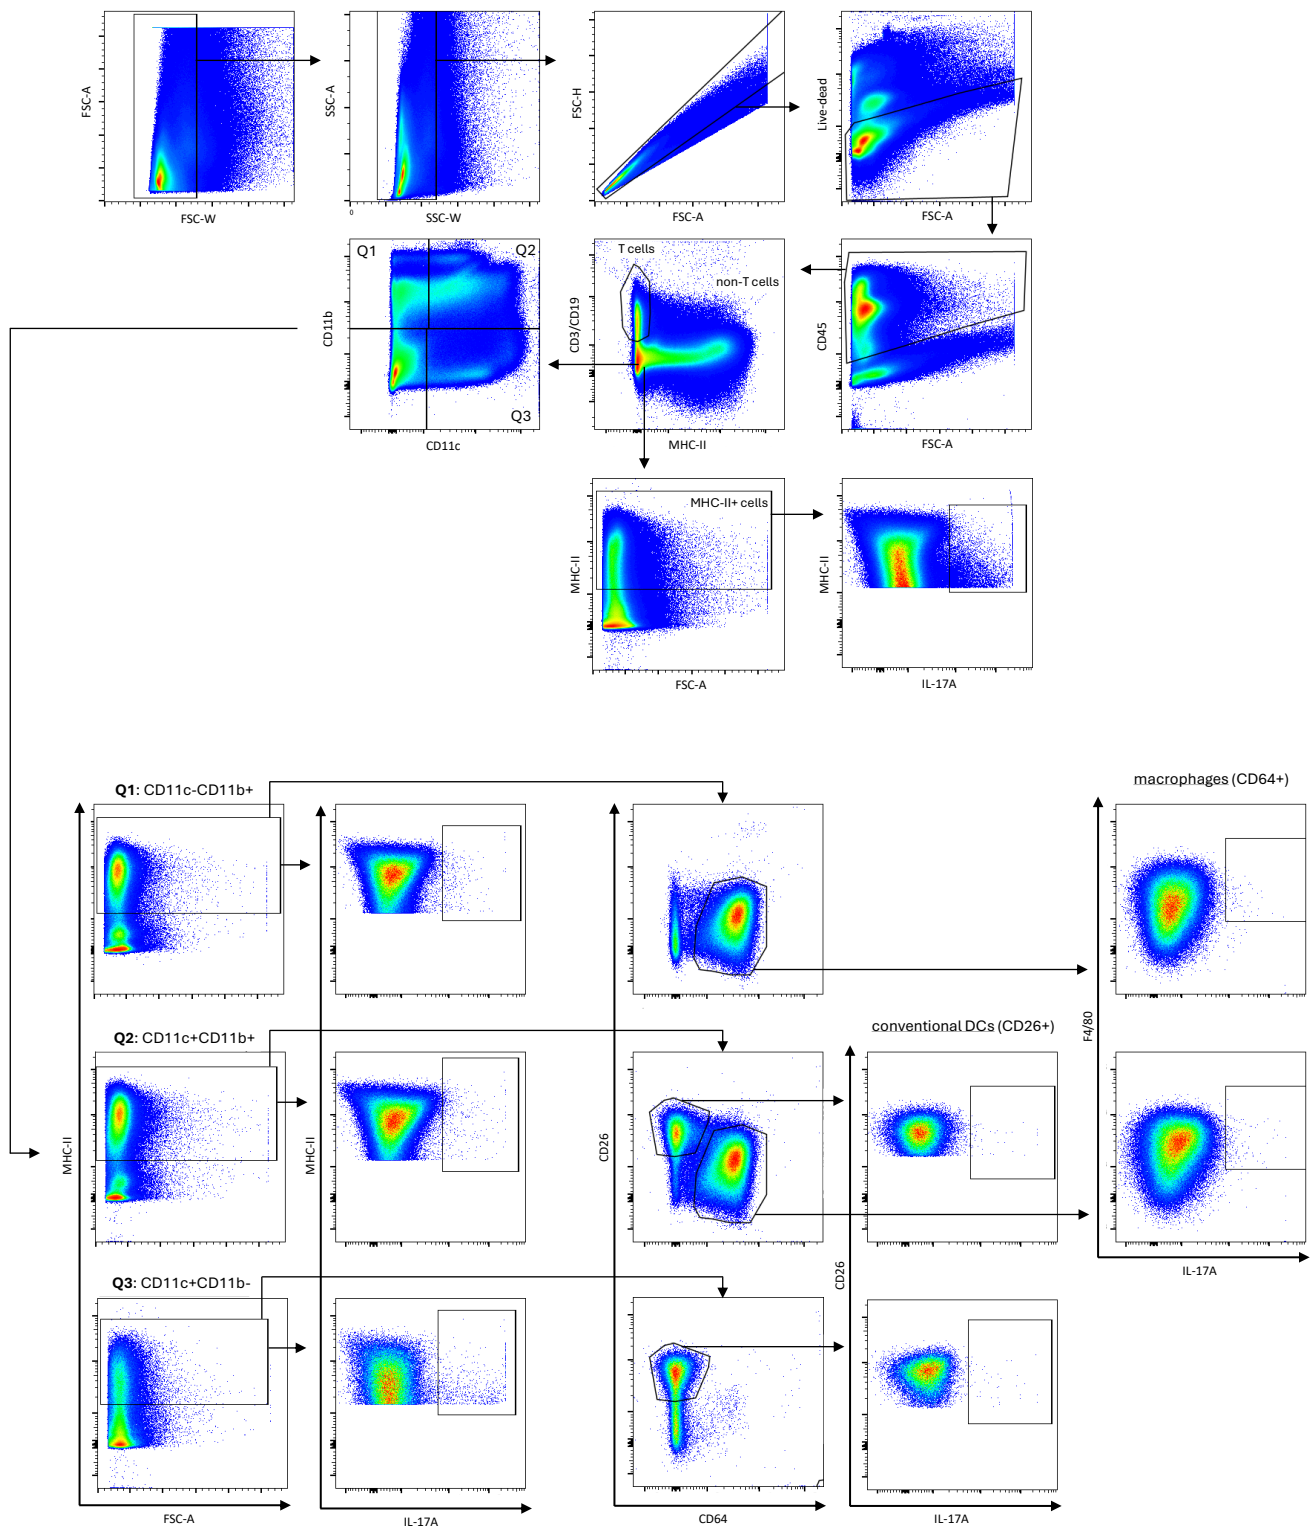

**Supplementary Figure S12.** Panel targeting antigen-presenting cells. Gating strategy for T cells, non-T cells, MHC-II<sup>+</sup> cells and different subtypes of MHC-II<sup>+</sup> cells, including conventional DCs and macrophages.

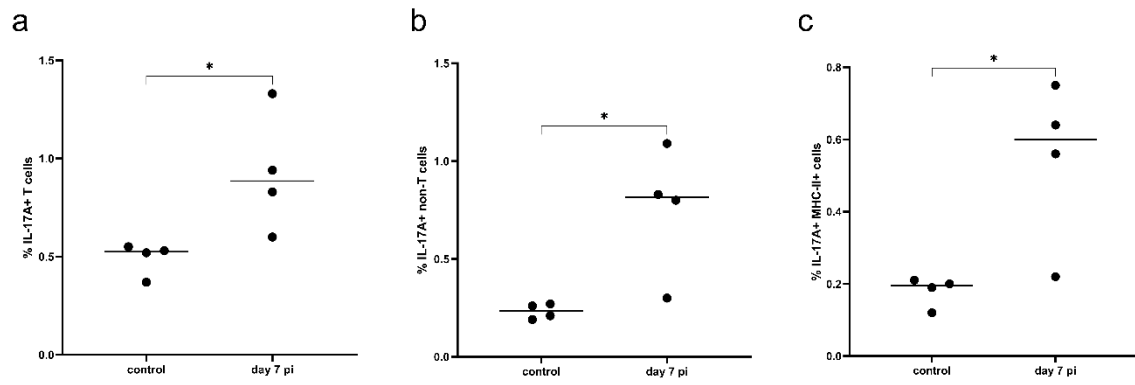

**Supplementary Figure S13.** IL-17A production by T cells (a), non-T cells (b) and MHC-II+ cells (c) in the lamina propria compartment of *G. muris* infected C57BL/6 mice at day 7 p.i. as measured by flow cytometry, expressed as %IL-17A+ cells of parent population. Differences were analyzed using a Mann-Whitney test (\*P < 0.05).

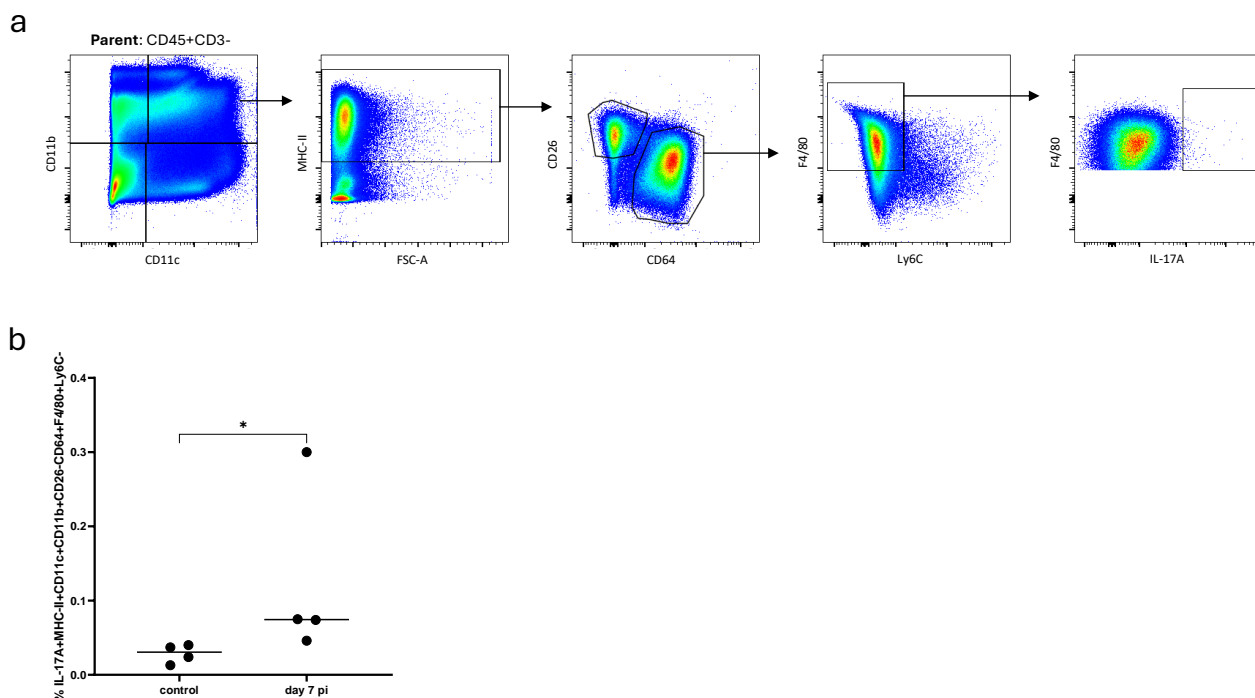

**Supplementary Figure S14.** (a) Flow cytometry gating strategy for MHC-II+CD11c+CD11b+CD26-CD64+F4/80+Ly6C- cells. (b) IL-17A production by this cell type in the lamina propria compartment of *G. muris* infected C57BL/6 mice at day 7 p.i. as measured by flow cytometry, expressed as %IL-17A+ cells of parent population. Differences were analyzed using a Mann-Whitney test (\* $P < 0.05$ ).
